# Supplementary material for: Targeted ablation of Arnt in mouse epidermis results in profound defects in desquamation and epidermal barrier function
Source: Oxford University Press journal article supplement (doi:10.1242/jcs.03282), 2006-11-15
Supplement: jcs03282tables1.pdf [file jcs03282tables1.pdf]

Supplementary Table S1. Differentially expressed genes

| Probe Set ID | Gene Symbol     | t-test/Anova | Avgr         | Gene Title                                                                            |
|--------------|-----------------|--------------|--------------|---------------------------------------------------------------------------------------|
| 1419230_at   | Krt11-2         | 2.36E-07     | -3.712063    | keratin complex 1, acidic, gene 12                                                    |
| 1419231_s_at | Krt11-2         | 3.66E-07     | -3.677800433 | keratin complex 1, acidic, gene 12                                                    |
| 1418649_at   | Egln3           | 1.21E-08     | -3.2664529   | EGL nine homolog 3 (C. elegans)                                                       |
| 1434195_at   | Prss35          | 0.00063239   | -2.3044876   | protease, serine, 35                                                                  |
| 1418648_at   | Egln3           | 1.23E-05     | -2.278906233 | EGL nine homolog 3 (C. elegans)                                                       |
| 1422257_s_at | Cyp2b10         | 0.000188646  | -2.278152933 | cytochrome P450, family 2, subfamily b, polypeptide 10                                |
| 1449365_at   | Edg8            | 0.000113168  | -2.020486833 | endothelial differentiation, sphingolipid G-protein-coupled receptor, 8               |
| 1425645_s_at | Cyp2b10         | 4.80E-05     | -2.0114634   | cytochrome P450, family 2, subfamily b, polypeptide 10                                |
| 1450645_at   | Mt4             | 0.000101685  | -1.9760637   | metallothionein 4                                                                     |
| 1422188_s_at | Tcrg            | 0.00011625   | -1.954218867 | T-cell receptor gamma chain /// T cell receptor gamma chain                           |
| 1438244_at   | Nf1b            | 0.000297612  | -1.888168733 | nuclear factor I/B                                                                    |
| 1455961_at   | Mme             | 9.19E-05     | -1.818924367 | Membrane metallo endopeptidase                                                        |
| 1416390_at   | Rctb2           | 0.001067669  | -1.7334055   | regulator of chromosome condensation and BTB domain containing protein 2              |
| 1417266_at   | Col6            | 9.15E-07     | -1.725338533 | chemokine (C-C motif) ligand 6                                                        |
| 1416481_s_at | Higd1a          | 0.000135494  | -1.724358633 | HIG1 domain family, member 1A                                                         |
| 1453360_a_at | Tex9            | 0.000636579  | -1.703543333 | testis expressed gene 9                                                               |
| 1436566_at   | Rab40b          | 4.86E-05     | -1.6680399   | Rab40b, member RAS oncogene family                                                    |
| 1418219_at   | Il15            | 0.000124253  | -1.641713967 | interleukin 15                                                                        |
| 1426340_at   | Slc1a3          | 8.94E-05     | -1.636747167 | solute carrier family 1 (glial high affinity glutamate transporter), member 3         |
| 1418826_at   | Msa46b          | 0.000106146  | -1.6175151   | membrane-spanning 4-domains, subfamily A, member 6B                                   |
| 1439016_x_at | Spr2a           | 3.89E-05     | -1.6052376   | small proline-rich protein 2A                                                         |
| 1450618_a_at | Spr2a           | 2.35E-04     | -1.5836734   | small proline-rich protein 2A                                                         |
| 1422542_at   | Gpr34           | 0.000361524  | -1.561782767 | G protein-coupled receptor 34                                                         |
| 1448502_at   | Slc16a7         | 3.36E-05     | -1.500206033 | solute carrier family 16 (monocarboxylic acid transporters), member 7                 |
| 1448359_a_at | Higd1a          | 2.48E-05     | -1.465078967 | HIG1 domain family, member 1A                                                         |
| 1420249_s_at | Col6            | 4.59E-07     | -1.448485733 | chemokine (C-C motif) ligand 6                                                        |
| 1451454_at   | Pcdh20          | 0.00203199   | -1.443424633 | protocadherin 20                                                                      |
| 1450430_at   | Mrc1            | 0.001047084  | -1.439210633 | mannose receptor, C type 1                                                            |
| 1423433_at   | Trove2          | 0.001065967  | -1.4106575   | TROVE domain family, member 2                                                         |
| 1448551_a_at | Trim2           | 1.71E-06     | -1.395877967 | tripartite motif protein 2                                                            |
| 1424410_at   | Ttc8            | 0.00011408   | -1.3700274   | tetratricopeptide repeat domain 8                                                     |
| 1427168_a_at | Col14a1         | 1.82E-05     | -1.352811867 | procollagen, type XIV, alpha 1                                                        |
| 1460197_a_at | Steap4          | 0.000228778  | -1.325791    | STEAP family member 4                                                                 |
| 1426787_at   | Sf11            | 0.000896628  | -1.321994433 | Sf11 homolog, spindle assembly associated (yeast)                                     |
| 1427655_a_at | A630038E17Rik   | 0.000895618  | -1.2983144   | RIKEN cDNA A630038E17 gene                                                            |
| 1450616_at   | Ear5            | 2.55E-05     | -1.2816092   | eosinophil-associated, ribonuclease A family, member 5                                |
| 1417028_a_at | Trim2           | 0.000126701  | -1.271967167 | tripartite motif protein 2                                                            |
| 1455700_at   | Mterfd3         | 0.000248432  | -1.2592221   | MTERF domain containing 3                                                             |
| 1415756_a_at | Snapap          | 9.70E-05     | -1.241414967 | SNAP-associated protein                                                               |
| 1416053_at   | Lrm1            | 0.001307997  | -1.239794667 | leucine rich repeat protein 1, neuronal                                               |
| 1426622_a_at | Qpct            | 0.000122179  | -1.2310838   | glutaminy-peptide cyclotransferase (glutaminy cyclase)                                |
| 1421937_at   | Dapp1           | 0.000455443  | -1.2160661   | dual adaptor for phosphotyrosine and 3-phosphoinositides 1                            |
| 1450770_at   | 3632451O06Rik   | 0.000538847  | -1.2115839   | RIKEN cDNA 3632451O06 gene                                                            |
| 1438887_a_at | Gcl             | 0.000364422  | -1.192778133 | germ cell-less homolog (Drosophila)                                                   |
| 1422954_at   | Zfp60           | 0.000359924  | -1.184648267 | zinc finger protein 60                                                                |
| 1416151_at   | Sfrs3           | 0.00222128   | -1.180315933 | splicing factor, arginine/serine-rich 3 (SRp20)                                       |
| 1420409_at   | Krt1-24         | 0.001202231  | -1.1634596   | keratin complex 1, acidic, gene 24                                                    |
| 1419063_at   | Ugf8a           | 0.002162591  | -1.152453967 | UDP galactosyltransferase 8A                                                          |
| 1418915_at   | 1810037K07Rik   | 0.000930549  | -1.150172667 | RIKEN cDNA 1810037K07 gene                                                            |
| 1451050_at   | Ntc5c3          | 4.55E-05     | -1.144837433 | 5'-nucleotidase, cytosolic III                                                        |
| 1450988_at   | Lgr5            | 0.000104528  | -1.128020167 | leucine rich repeat containing G protein coupled receptor 5                           |
| 1460259_s_at | Clca1 /// Clca2 | 4.81E-05     | -1.1227931   | chloride channel calcium activated 1 /// chloride channel calcium activated 2         |
| 1425140_at   | Lactb2          | 6.22E-05     | -1.1223803   | lactamase, beta 2                                                                     |
| 1423155_at   | Sri             | 2.21E-05     | -1.116169533 | sorcin                                                                                |
| 1429352_at   | Mocos           | 0.001832595  | -1.1025282   | molybdenum cofactor sulfurase                                                         |
| 1449071_at   | Myf7            | 5.08E-05     | -1.100689867 | myosin, light polypeptide 7, regulatory                                               |
| 1451461_a_at | Aldoc           | 0.000126875  | -1.096107167 | aldolase 3, C isoform                                                                 |
| 1416842_at   | Gstm5           | 6.66E-05     | -1.0933743   | glutathione S-transferase, mu 5                                                       |
| 1436996_x_at | Lzp-s           | 3.63E-05     | -1.0849762   | P lysozyme structural                                                                 |
| 1417430_at   | Cdr2            | 4.61E-06     | -1.080600767 | cerebellar degeneration-related 2                                                     |
| 1449122_at   | 3110003A22Rik   | 0.001243961  | -1.0788229   | RIKEN cDNA 3110003A22 gene                                                            |
| 1416152_a_at | Sfrs3           | 0.001468163  | -1.074717033 | splicing factor, arginine/serine-rich 3 (SRp20)                                       |
| 1451787_at   | Cyp2b10         | 0.000117668  | -1.063870267 | cytochrome P450, family 2, subfamily b, polypeptide 10                                |
| 1448813_at   | Aadac           | 0.000309393  | -1.062162967 | arylcetamide deacetylase (esterase)                                                   |
| 1421936_at   | Dapp1           | 0.001381256  | -1.043207967 | dual adaptor for phosphotyrosine and 3-phosphoinositides 1                            |
| 1419552_at   | Echdc1          | 1.18E-06     | -1.034101833 | enoyl Coenzyme A hydratase domain containing 1                                        |
| 1422645_at   | Hfe             | 0.001255647  | -1.0315953   | hemochromatosis                                                                       |
| 1423569_at   | Galm            | 0.000753683  | -1.025528    | glycine amidinotransferase (L-arginine:glycine amidinotransferase)                    |
| 1428113_at   | 4930403J22Rik   | 0.000133631  | -1.0226883   | RIKEN cDNA 4930403J22 gene                                                            |
| 1450825_at   | Asah3           | 0.00011572   | -1.015298967 | N-acylsphingosine amidohydrolase (alkaline ceramidase) 3                              |
| 1448050_s_at | Mapk4k4         | 3.39E-07     | 1.00211      | mitogen-activated protein kinase kinase kinase kinase 4                               |
| 1425895_a_at | Id1             | 0.000735193  | 1.010493633  | inhibitor of DNA binding 1                                                            |
| 1439389_s_at | Myadm           | 0.00207017   | 1.0136956    | myeloid-associated differentiation marker                                             |
| 1434514_at   | Rbm15           | 0.000111617  | 1.017873833  | RNA binding motif protein 15                                                          |
| 1416067_at   | Ilfri1          | 1.41E-05     | 1.021099567  | interferon-related developmental regulator 1                                          |
| 1451776_s_at | MGI:1916782     | 0.001074486  | 1.023476767  | homeobox only domain                                                                  |
| 1423271_at   | Gjb2            | 9.08E-05     | 1.028331467  | gap junction membrane channel protein beta 2                                          |
| 1427095_at   | Cdcp1           | 7.87E-05     | 1.032642733  | CUB domain containing protein 1                                                       |
| 1449424_at   | Plek2           | 5.27E-05     | 1.0355516    | pleckstrin 2                                                                          |
| 1425606_at   | Slc5a8          | 2.62E-05     | 1.037546     | solute carrier family 5 (iodide transporter), member 8                                |
| 1416762_at   | S100a10         | 8.16E-06     | 1.0443273    | S100 calcium binding protein A10 (calpactin)                                          |
| 1421262_at   | Lipg            | 3.83E-05     | 1.052711133  | lipase, endothelial                                                                   |
| 1421997_s_at | Ilg3a3          | 2.82E-05     | 1.061272467  | integrin alpha 3                                                                      |
| 1417328_at   | Erc11           | 2.06E-05     | 1.0757111    | excision repair cross-complementing rodent repair deficiency, complementation group 1 |
| 1419498_at   | 2010002A20Rik   | 1.98E-05     | 1.088392667  | RIKEN cDNA 2010002A20 gene                                                            |
| 1438019_at   | 1810043M15Rik   | 1.19E-05     | 1.097905033  | RIKEN cDNA 1810043M15 gene                                                            |
| 1433733_a_at | Cry1            | 3.48E-05     | 1.108288333  | cryptochrome 1 (photolabile-like)                                                     |
| 1418970_a_at | Bcl10           | 5.42E-05     | 1.129694433  | B-cell leukemia/lymphoma 10                                                           |
| 1455158_at   | Ilg3a3          | 0.000114722  | 1.1318796    | integrin alpha 3                                                                      |
| 1436584_at   | Spry2           | 3.03E-05     | 1.159752133  | sprouty homolog 2 (Drosophila)                                                        |
| 1435226_at   | Ibrdc3          | 4.25E-06     | 1.1651381    | IBR domain containing 3                                                               |
| 1448612_at   | Sfn             | 1.52E-05     | 1.1853238    | stratifin                                                                             |
| 1448170_at   | Siah2           | 7.78E-05     | 1.189715067  | seven in absentia 2                                                                   |
| 1451680_at   | Srxn1           | 5.95E-05     | 1.190804     | sulfiredoxin 1 homolog (S. cerevisiae)                                                |
| 1454736_at   | 4921515A04Rik   | 0.000257945  | 1.2037354    | RIKEN cDNA 4921515A04 gene                                                            |
| 1419491_at   | Defb1           | 8.38E-05     | 1.2146904    | defensin beta 1                                                                       |
| 1442026_at   | ---             | 0.001730814  | 1.218938733  | ---                                                                                   |
| 1422659_at   | Camk2d          | 1.17E-05     | 1.225341733  | calcium/calmodulin-dependent protein kinase II, delta                                 |
| 1427416_x_at | Dusp7           | 8.11E-07     | 1.239468533  | dual specificity phosphatase 7                                                        |
| 1424711_at   | Tmem2           | 3.20E-06     | 1.253082733  | transmembrane protein 2                                                               |
| 1416871_at   | Adam8           | 4.01E-05     | 1.2798786    | a disintegrin and metalloproteinase domain 8                                          |
| 1423321_at   | Myadm           | 0.00039799   | 1.281268567  | myeloid-associated differentiation marker                                             |
| 1432478_a_at | Ibrdc3          | 5.46E-05     | 1.286755033  | IBR domain containing 3                                                               |
| 1451375_at   | Ehf             | 0.006790813  | 1.314848633  | ets homologous factor                                                                 |
| 1449852_a_at | Ehd4            | 4.06E-05     | 1.330769767  | EH-domain containing 4                                                                |
| 1420088_at   | ---             | 9.21E-05     | 1.3857817    | ---                                                                                   |
| 1428081_at   | Klhl21          | 0.000124064  | 1.389375067  | kelch-like 21 (Drosophila)                                                            |
| 1425351_at   | Srxn1           | 0.000856198  | 1.397189133  | sulfiredoxin 1 homolog (S. cerevisiae)                                                |
| 1425837_a_at | Ccrn4l          | 5.40E-05     | 1.4220894167 | CCR4 carbon catabolite repression 4-like (S. cerevisiae)                              |
| 1424268_at   | Smox            | 3.88E-06     | 1.421619     | spermine oxidase                                                                      |
| 1451612_at   | Mt1             | 0.000662259  | 1.433491867  | metallothionein 1                                                                     |
| 1424040_at   | Rprc1           | 2.96E-06     | 1.447909767  | arginine/proline rich coiled-coil 1                                                   |
| 1434369_a_at | Cryab           | 8.07E-05     | 1.474317467  | crystallin, alpha B                                                                   |
| 1430125_s_at | Pq1c1           | 5.03E-06     | 1.5516156    | PQ loop repeat containing 1                                                           |
| 1424942_a_at | Myc             | 2.56E-05     | 1.576376833  | myelocytomatosis oncogene                                                             |
| 1450188_s_at | Lipg            | 2.70E-07     | 1.5773951    | lipase, endothelial                                                                   |
| 1416442_at   | Ier2            | 0.001166582  | 1.582609667  | immediate early response 2                                                            |
| 1423100_at   | Fos             | 0.001007956  | 1.615779967  | FBJ osteosarcoma oncogene                                                             |
| 1417065_at   | Egr1            | 3.16E-05     | 1.6236002    | early growth response 1                                                               |
| 1423233_at   | Cebpd           | 0.000140625  | 1.6567732    | CCAAT/enhancer binding protein (C/EBP), delta                                         |
| 1449731_s_at | ---             | 1.96E-05     | 1.662402733  | ---                                                                                   |
| 1426567_a_at | Pq1c1           | 8.53E-05     | 1.700366967  | PQ loop repeat containing 1                                                           |
| 1421943_at   | Tgfa            | 1.12E-05     | 1.758150067  | transforming growth factor alpha                                                      |
| 1426875_s_at | Srxn1           | 6.67E-05     | 1.769540467  | sulfiredoxin 1 homolog (S. cerevisiae)                                                |
| 1451594_s_at | Serpinh6c       | 4.47E-06     | 1.8033144    | serine (or cysteine) peptidase inhibitor, clade B, member 6c                          |
| 1431339_a_at | Efh2            | 0.00012266   | 1.8041541    | EF hand domain containing 2                                                           |
| 1416431_at   | Tubb6           | 0.000143601  | 1.8068879    | tubulin, beta 6                                                                       |
| 1460393_a_at | Dusp7           | 0.000651256  | 1.810689633  | dual specificity phosphatase 7                                                        |
| 1448529_at   | Tthbd           | 0.00011617   | 1.8242792    | thrombomodulin                                                                        |
| 1419474_a_at | Ehf             | 0.000180638  | 1.833449667  | ets homologous factor                                                                 |
| 1422240_s_at | Spr2h           | 3.50E-05     | 1.841429867  | small proline-rich protein 2H                                                         |
| 1448932_at   | Krt11-6         | 1.34E-05     | 1.875484     | keratin complex 1, acidic, gene 16                                                    |
| 1423306_at   | 2010002N04Rik   | 1.99E-05     | 1.896356467  | RIKEN cDNA 2010002N04 gene                                                            |
| 1419492_s_at | Defb1           | 0.000619932  | 1.9224169    | defensin beta 1                                                                       |
| 1431936_a_at | Neu2            | 7.90E-05     | 1.931981333  | neuraminidase 2                                                                       |
| 1419431_at   | Ereg            | 0.000117409  | 1.9552495    | epiregulin                                                                            |
| 1452519_a_at | Zfp36           | 0.000775952  | 2.038867167  | zinc finger protein 36                                                                |
| 1448306_at   | NfYb1a          | 1.12E-05     | 2.064505167  | nuclear factor of kappa light chain gene enhancer in B-cells inhibitor, alpha         |
| 1424086_at   | D9Uc1a          | 1.05E-05     | 2.127011067  | DNA segment, Chr 9, University of California at Los Angeles 1                         |
| 1452418_at   | 1200016E24Rik   | 7.02E-05     | 2.127970167  | RIKEN cDNA 1200016E24 gene                                                            |
| 1422704_at   | Gyk             | 7.48E-07     | 2.242385433  | glycerol kinase                                                                       |
| 1415834_at   | Dusp6           | 4.53E-05     | 2.303629767  | dual specificity phosphatase 6                                                        |
| 1427005_at   | Plk2            | 0.00015386   | 2.321262233  | polo-like kinase 2 (Drosophila)                                                       |
| 1453238_s_at | E430024C06Rik   | 6.46E-06     | 2.541364733  | RIKEN cDNA E430024C06 gene                                                            |
| 1418133_at   | Bcl3            | 1.37E-06     | 2.631146867  | B-cell leukemia/lymphoma 3                                                            |
| 1455899_x_at | Soc3            | 0.001355354  | 2.667132867  | suppressor of cytokine signaling 3                                                    |
| 1418349_at   | Hbegf           | 0.000360589  | 2.676067567  | heparin-binding EGF-like growth factor                                                |
| 1423933_a_at | 1600029D21Rik   | 0.000123509  | 2.697311233  | RIKEN cDNA 1600029D21 gene                                                            |
| 1449133_at   | Spr1a           | 2.86E-05     | 2.740214633  | small proline-rich protein 1A                                                         |
| 1422784_at   | Krt2-6a         | 0.00956      | 2.959487775  | keratin complex 2, basic, gene 6a                                                     |
| 1435137_s_at | 1200016E24Rik   | 5.00E-07     | 2.9949676    | RIKEN cDNA 1200016E24 gene /// hypothetical gene supported by AK004796                |
| 1417487_at   | Fosl1           | 0.000145519  | 3.147900067  | fos-like antigen 1                                                                    |
| 1427932_s_at | 200003101Rik    | 7.53E-08     | 3.3668875    | RIKEN cDNA 200003101 gene /// hypothetical gene supported by AK004796                 |
| 1427700_x_at | Krt2-6a         | 0.00233      | 3.368921485  | keratin complex 2, basic, gene 6a                                                     |
| 1449994_at   | Epgn            | 6.69E-05     | 3.393066233  | epithelial mitogen                                                                    |
| 1448377_at   | Slpi            | 6.55E-05     | 3.704208267  | secretory leukocyte peptidase inhibitor                                               |
| 1422783_a_at | Krt2-6a         | 0.00329      | 3.808532470  | keratin complex 2, basic, gene 6a                                                     |
| 1419209_at   | Cxcl1           | 7.07E-05     | 3.834693967  | chemokine (C-X-C motif) ligand 1                                                      |
| 1421134_at   | Areg            | 3.41E-05     | 3.8750889    | amphiregulin                                                                          |
| 1448756_at   | S100a9          | 2.28E-05     | 4.412246767  | S100 calcium binding protein A9 (calgranulin B)                                       |
| 1419149_at   | Serpine1        | 5.11E-05     | 4.503452567  | serine (or cysteine) peptidase inhibitor, clade E, member 1                           |
| 1421806_at   | Defb3           | 0.001294852  | 4.6443679    | defensin beta 3                                                                       |
| 1456001_at   | Spr11           | 0.005068762  | 5.260587367  | small proline rich-like 1                                                             |
| 1422963_at   | Spr2i           | 3.74E-06     | 5.530648     | small proline-rich protein 2I                                                         |
| 1419394_s_at | S100a8          | 0.000404717  | 5.535525667  | S100 calcium binding protein A8 (calgranulin A)                                       |
| 1450811_at   | Spr2j           | 1.96E-06     | 5.781713433  | small proline-rich protein 2J                                                         |
| 1449833_at   | Spr2f           | 2.57E-05     | 6.081538533  | small proline-rich protein 2F                                                         |
