# Supplementary material for: Targeted ablation of Arnt in mouse epidermis results in profound defects in desquamation and epidermal barrier function
Source: Oxford University Press journal article supplement (doi:10.1242/jcs.03282), 2006-11-15
Supplement: jcs03282tables2.pdf [file jcs03282tables2.pdf]

**Supplementary Table S2.** List of antibodies used.

| <b>Antigen</b> | <b>Antibody</b>                      | <b>Vendor/Catalog#</b>                     | <b>Dilution</b> | <b>Secondary antibody</b>                                                      |
|----------------|--------------------------------------|--------------------------------------------|-----------------|--------------------------------------------------------------------------------|
| Arnt           | Goat polyclonal                      | Santa Cruz, CA/ sc-8076                    | 1:150           | Donkey anti-goat Ig G-B (sc-2042, Santa Cruz)                                  |
| Filaggrin      | Rabbit polyclonal                    | Covance Research Products, CA/<br>PRB-417P | 1:500           | Goat anti-rabbit Ig G-B (sc-2040, Santa Cruz)                                  |
| Loricrin       | Rabbit polyclonal                    | Covance Research Products, CA/<br>PRB-145P | 1:200           | Goat anti-rabbit Ig G-B (sc-2040, Santa Cruz)                                  |
| Involucrin     | Rabbit polyclonal                    | Covance Research Products, CA/<br>PRB-140C | 1:500           | Goat anti-rabbit Ig G-B (sc-2040, Santa Cruz)                                  |
| b-actin        | Rabbit affinity<br>isolated antibody | Sigma-Aldrich/ A-2066                      | 1:200           | HRP-goat anti-rabbit IgG (H+L)<br>(111-035-144, Jackson<br>ImmunoResearch Lab) |
