# Supplementary material for: Targeted ablation of Arnt in mouse epidermis results in profound defects in desquamation and epidermal barrier function
Source: Oxford University Press journal article supplement (doi:10.1242/jcs.03282), 2006-11-15
Supplement: jcs03282tables3.pdf [file jcs03282tables3.pdf]

### Supplementary Table S3. Primers used for real-time PCR analysis

| Sequence ID | Primer name | Sequence                        | Product length |
|-------------|-------------|---------------------------------|----------------|
| AF347023    | Asah3 S     | 5'-TGAGGTGGATTGGTGTGAGAG-3'     | 137            |
|             | Asah3 A     | 5'-TACGCTTCTGGGCATACGG-3'       |                |
| U73004      | Slpi S      | 5'-TGTTCCCATTCGCAAACCAGTG-3'    | 217            |
|             | Slpi A      | 5'-GCACACCGAGCACGAGTCC-3'       |                |
| NM_013650   | S100a8 S    | 5'-TCAAGACATCGTTTGAAAGGAAATC-3' | 84             |
|             | S100a8 A    | 5'-GGTAGACATCAATGAGGTTGCTC-3'   |                |
| NM_009114   | S100a9 S    | 5'-AAAGGCTGTGGGAAGTAATTAAGAG-3' | 81             |
|             | S100a9 A    | 5'-GCCATTGAGTAAGCCATTCCC-3'     |                |
| M16465      | S100a10 S   | 5'-GACCACTTGACAAAGGAGGAC-3'     | 374            |
|             | S100a10 A   | 5'-TTCTCTCTCAGATTGTTGAATTGG-3'  |                |
| AK152473    | Arnt S      | 5'-TTTATCCCTAGAGATGGGTACAGG-3'  | 134            |
|             | Arnt A      | 5'-CCACAGGCTGGACAGAAACC-3'      |                |
| M33960      | Serpine1 S  | 5'-CGCCTCCTCATCCTGCCTAAG-3'     | 190            |
|             | Serpine1 A  | 5'-CTGTGCCGCTCTCGTTTACC-3'      |                |
| X91824      | Sprr1a S    | 5'-AGAGCCATGCCTGAAGACCTG-3'     | 258            |
|             | Sprr1a A    | 5'-CATACACTTGTCTCACTCCTCACC-3'  |                |
| NM_011475   | Sprr2i S    | 5'-CCTGAGCCTTGTCTGAGTC-3'       | 246            |
|             | Sprr2i A    | 5'-ATGTAGAAGGAGGTGCTATGTGG-3'   |                |
| NM_008508   | Lor S       | 5'-CCTGTGGGTTGTGGAAAGACC-3'     | 102            |
|             | Lor A       | 5'-AGAGCCTCCTCCAGATGAGC-3'      |                |
| NM_008412   | Ivl S       | 5'-AGAAGTGCATCTGGGTCAGC-3'      | 146            |
|             | Ivl A       | 5'-GCTTCTGCTTCTGTTTCTGTCC-3'    |                |
| AK144782    | Sprr1a S    | 5'-AGAGCCATGCCTGAAGACC-3'       | 130            |
|             | Sprr1a A    | 5'-TTTTAGGTGGTGCAAGGAGAG-3'     |                |
| AK003391    | Sprr2a S    | 5'-GAAGTGCCCTGAGCCTTGTC-3'      | 133            |
|             | Sprr2a A    | 5'-AGGTGGCATTGCTCATAGC-3'       |                |
| NM_011475   | Sprr2i S    | 5'-TCTCACATGCCTCCATAGC-3'       | 95             |
|             | Sprr2i A    | 5'-CATGTAGAAGGAGGTGCTATG-3'     |                |
| NM_011476   | Sprr2j S    | 5'-TGTCTTACCAAGAGCAGCAGTG-3'    | 142            |
|             | Sprr2j A    | 5'-TGGCAGTGGATAGGACTCTGG-3'     |                |
| NM_033175   | Sprr1 S     | 5'-CTGCCAGCAGAGTCAGAAGC-3'      | 126            |
|             | Sprr1 A     | 5'-CTTGTAGCACAGCAGGAAGAGG-3'    |                |
| X03672      | Actb S      | 5'-CCTTCTTGGGTATGGAATCCTGTG-3'  | 98             |
|             | Actb A      | 5'-TGTGTTGGCATAGAGGTCCTTACG-3'  |                |
